# Supplementary material
Source: PubMed Central journal article supplement (PMC3924043)
Supplement: supp_kft234_toxsci_13_0580_File009.pdf [file supp_kft234_toxsci_13_0580_File009.pdf]

**TCDD (n = 46)**

CCATAGTCGCGTGACAGGAAT  
GATTCATTGCGGTGCGAGTGAG  
GATTCATCGCGGTGAGAAGATG  
AAAATAFCGCGGTGAGAATCTT  
AGGGCCTAGCGGTGACAAGGTC  
AGTGGTTCGCGGTGCGAATCTT  
GGGCCCTTGCGGTGACATAATG  
AGCTTATCGCGGTGCGAATCTT  
GATTCATCGCGGTGCAAAGGTG  
GATTCATCGCGGTGAGAGCGTG  
CAAGATTCGCGGTGCAAACGAC  
GGGCCATCGCGGTGACAACTG  
CAAGATTCGCGGTGCAAACGCA  
CCTCAATCGCGGTGCGATGAAT  
GCCGCATCGCGGTGCGAGTGAA  
GGCCGATAGCGGTGAGAACCGA  
TTCTGATCGCGGTGCGAGCGGC  
TTCAGATTGCGGTGCGAGCGGC  
CACTGTTCGCGGTGAGAGGCC  
CAAGATTCGCGGTGCAAAGGTA  
TTCAGATTGCGGTGCGAGCGGC  
CCCAGATTGCGGTGCGAGGAAT  
CATTGCTCGCGGTGCGAATCTT  
GGGCCATCGCGGTGCGACTGAG  
GGGCCATAGCGGTGACAAATCGG  
ATACAATCGCGGTGCGAATCTT  
CCGATGTTGCGGTGCGAATCTT  
CGATAGTTGCGGTGCGAATCTT  
CCGATGTTGCGGTGCGAATCTT  
CACGAATAGCGGTGGAATCTTG  
CTAATATCGCGGTGAGAATCTT  
TTCCGGTTGCGGTGCGAGCGGC  
GACAAAATCGCGGTGCGAATCTT  
GGGCCATAGCGGTGACAAAATG  
TCTAATATGCGGTGCGAATCTT  
TGTAATGTGCGGTGCGAATCTT  
AAAAATGTGCGGTGCGAATCTT  
CACCGTGTGCGGTGCGAATCTT  
TCAAGATTCCCGTGACAAGATA  
TCAAGATTCCCGTGCGAAGACC  
TCAAGATTCCCGTGCGAACAGC  
TCAAGATTCCCGTGCAAAGCGG  
TCAAGATTCCCGTGCGAACGTA  
TCAAGATTCCCGTGCGAACATC  
TCAAGATTCCCGTGCGAAGGCG  
GGAGCATGCGGTGCGAATCTT

**YH439 (n = 28)**

TGTAATGTGCGGTGCGAATCTT  
CCCATGTTGCGGTGCGAATCTT  
TGTAATGTGCGGTGCGAATCTT

TTCAACTCGCGGTGCGATCGGC  
GGGCCATCGCGGTGCGAACAGG  
GATGTGTTGCGGTGAGAATCTT  
CAAGATTCGCGGTGCGAGGATT  
TCGGGTATGCGGTGCGAAGGCC  
CAGGGCCTGCGGTGCGACGATA  
TAAAGCTAGCGGTGCGAATCTT  
GGGCCATGCGGTGCGAAAATGA  
TGTAATGTGCGGTGCGAATCTT  
CTACCTTTGCGGTGCGAATCTT  
GGGCCATGCGGTGCAAAGGGA  
GGGCCATAGCGGTGACAATACG  
TGTAATGTGCGGTGCGAATCTT  
CCCCCATGCGGTGACATGAAT  
GGGCCCTCGCGGTGCGAACATG  
TCCGCATGCGGTGCGTAGGCC  
TCAAGATTCCCGTGCGAACATC  
GGGCCATGCGGTGCGAAAATGA  
TCAAGATTCCCGTGCGAAGCCC  
GAGGTATCGCGGTGCGAATCTT  
CAAGATTCGCGGTGAGAAGCTC  
TGTAATGTGCGGTGCGAATCTT  
TTCCGTTTCCCGTGCGAACGGC  
ACAGGATAGCGGTGCGGCCCTG  
GATTCATCGCGGTGACATAAGG

**βNF (n = 38)**

GCCCATATGCGGTGCGATGAA  
TCCTAGTTGCGGTGCGACGGCC  
GACCGATCGCGGTGAGAATCTT  
CCAACGTTGCGGTGCGAATCTT  
TCATGGTTCGCGGTGCGGAGGCC  
AACGACTTGCGGTGCGAATCTT  
CCCAAAATCGCGGTGAGAATCTT  
CAAAGTATGCGGTGAGAATCTT  
ATTTCGTGTGCGGTGACAAGCGG  
CCTCAATCGCGGTGCTAAGAAT  
TCATGGACGCGGTGCGGTGGCC  
GCGGCTATGCGGTGCGAATCTT  
ATCATCTAGCGGTGCGAATCTT  
TCAAGATTCCCGTGCGAAGGCT  
GCCTAGTTGCGGTGACAATGAA  
CTACCGTAGCGGTGCGAATCTT  
CAAGATTCGCGGTGAGAACCCT  
TCAAGATTCCCGTGCGAACGCT  
TGGGCGTAGCGGTGCGAATCTT  
CCCTGCTAGCGGTGCGAATCTT  
TTCAGATCGCGGTGAGAAGGGC  
TTCAGGTTGCGGTGCGAGTGCC  
TTCAGGTTGCGGTGCGAGTGCC  
AGGGCCTTCCCGTGAGAATGCG  
TCAAAAATCGCGGTGCGAAGGCC

**Supplemental Figure S1: Compilation of all DNA sequences isolated in the ligand-dependent DNA selection and amplification studies.**  
Continued on next page.

GCGGCT**ATGCGTGCGAATCTT**  
CCTGGAT**TGCGTGCGAATCTT**  
TCAAGAT**TCCGTGCGAAGCAC**  
CAATTG**TTGCGTGCGAATCTT**  
CGAACAT**TGCGTGCGAATCTT**  
TCAAGAT**TCCGTGAGAGTATC**  
CCCCAA**TAGCGTGCAACGAAT**  
GCCTCA**TAGCGTGAGAAGGAA**  
GATTCG**TAGCGTGCGAAGTTG**  
GGCCGAT**TCGCGTGCGATAGGA**  
GGGCCT**ATGCGTGACAAAATG**  
GGCCCA**TCGCGTGACGCTCGA**  
CGACCA**TGGCGTGACAGAATC**

**3MC (n = 30)**

GGGCCC**TTGCGTGTAAACGAG**  
CAAGAT**TCGCGTGAGAAGGGG**  
TCATGAT**TCCGTGACCAACAGG**  
CAAGAT**TCGCGTGAGAAGGGG**  
ATTCGAT**TTGCGTGCCAATCGG**  
TCAACT**TGCCGTGCGAAGGCC**  
TCAAGAT**TCCGTGCGAAGAGT**  
ATTCGAT**TAGCGTGCGAATCTT**  
GGCCTA**TAGCGTGCGAATCTT**  
TCAAGAT**TTCCGTGCGAATCTT**  
TCAAGAT**TTCCGTGACAAACCC**  
ATTCGAT**TTGCGTGCCAATCGG**  
TTCCGAT**TCGCGTGAGAAGGGC**  
CAAGAT**TCGCGTGACAATGGG**  
TTCAGCT**TTGCGTGCGAATCTT**  
CAAGAT**TCGCGTGCGAACCCT**  
CTAGGAT**TCGCGTGCGAAGGCC**  
TCGTGAT**TCGCGTGCCGCGGCC**  
TCGTGAT**TCGCGTGCCGCGGCC**  
GCCAGG**TTGCGTGCGAATCTT**  
ACATCC**TTGCGTGCGAATCTT**  
GGCCTA**TAGCGTGCGAATCTT**  
ATTCGG**TCGCGTGCAAAATGGG**  
CCCACA**TCGCGTGCGAAGGAA**  
TCCGGT**TTGCGTGCGAAGGGC**  
GGCCCA**TCGCGTGCGAAAAGA**  
TTCAGAT**TCGCGTGAGAGGGC**  
GAGATA**TTGCGTGCGAATCTT**  
AGGGCC**TTGCGTGCGATGAGA**  
TCAAGAT**TTCCGTGCGAAGAAT**

**IR (n = 27)**

TGACTG**TCGCGTGAGAATCTT**  
ACAAGAT**TCGCGTGCGAATCTT**  
CTATCA**TTGCGTGCGAATCTT**  
ACAAGAT**TCGCGTGCGAATCTT**  
CCTTGG**TCGCGTGCGAAGGCC**

ACAAGAT**TCGCGTGCGAATCTT**  
GGGCCA**TCGCGTGCGAAGTCC**  
TACACAT**TCGCGTGCGAATCTT**  
CCCCGC**TCGCGTGAGAATCTT**  
TCAAGAT**TCCGTGAGAAGGGT**  
TTCAGG**TTGCGTGACAATGGC**  
GCACAT**ATGCGTGCGAATCTT**  
CCCCAA**TAGCGTGCCAAGAAT**  
CGGCAT**ATGCGTGCGAATCTT**  
CACGAAT**TGTCGTGAGAATCTT**  
CAATAT**ATGCGTGCGAATCTT**  
TCCACG**TTGCGTGCGAAGGCC**  
GCCTGT**TCGCGTGCGAAGGAA**  
CAAGAT**TCGCGTGCGAAGCTG**  
TCATGC**TTGCGTGCGAAGGCC**  
CTAACAT**TCGCGTGCGAAGGCC**  
TCAAGAT**TCCGTGCGAAGGAA**  
TTCCAT**TCGCGTGACACGGGC**  
TGTAAT**TGTCGTGCGAATCTT**  
CGCGTT**ATGCGTGCGAATCTT**  
GGCCCC**TTGCGTGACAAATGA**  
CGCCAA**TCGCGTGCGAATCTT**

**LK (n = 27)**

ACCGAG**TTGCGTGCGAATCTT**  
TCAAGAT**TTCCGTGCGAAGGGG**  
CAAGGG**TAGCGTGCGAATCTT**  
GCCCAG**TCGCGTGCAAAATGAA**  
TCAAGAT**TTCCGTGAGAATGCT**  
TCAAGAT**TTCCGTGACAAGGTA**  
GGGCCG**TCGCGTGCCAAGTAG**  
GATCGAT**TGTCGTGCGAATCTT**  
TCAAGAT**TTCCGTGAGAGCGTG**  
GACCGG**TTGCGTGAGAATCTT**  
AACCGT**TTGCGTGAGAATCTT**  
CCACAG**TTGCGTGCGAATCTT**  
ATTCAA**TCGCGTGACGTGTGG**  
TCAAGAT**TTCCGTGACAACCTCC**  
TTCATA**TTGCGTGCAACGGGC**  
GATTCAT**TCGCGTGCCGGTCGG**  
CCACCA**TCGCGTGACTAGAAT**  
TCTCCA**TTGCGTGCGAATCTT**  
GGCCCA**TCGCGTGTGAAATGA**  
CTATGC**TTGCGTGCGAATCTT**  
CAAGAT**TCGCGTGACAGAACT**  
TCAAGAT**TTCCGTGCGAATCTT**  
TCAAGAT**TTCCGTGCGAATCTT**  
CAAGAT**TCGCGTGACAATAAC**  
GGCCTT**TAGCGTGCGAAGGGG**  
TCAAGAT**TTCCGTGAGAACAGA**  
CTATGC**TTGCGTGCGAATCTT**

**Supplemental Figure S1: Compilation of all DNA sequences isolated in the ligand-dependent DNA selection and amplification studies.**  
See Materials and Methods for details.

|                       | 1  | 2  | 3  | 4  | 5  | 6  | 7  | 8  | 9  | 10  | 11  | 12  | 13  | 14 | 15 | 16  | 17 | 18 | 19 | 20 | 21 |
|-----------------------|----|----|----|----|----|----|----|----|----|-----|-----|-----|-----|----|----|-----|----|----|----|----|----|
| <b>Wild Type</b>      |    |    |    |    |    |    |    |    |    |     |     |     |     |    |    |     |    |    |    |    |    |
|                       | C  | C  | G  | G  | A  | G  | T  | T  | G  | C   | G   | T   | G   | A  | G  | A   | A  | G  | A  | G  | C  |
| <b>TCDD (n = 46)</b>  |    |    |    |    |    |    |    |    |    |     |     |     |     |    |    |     |    |    |    |    |    |
| <b>#</b>              |    |    |    |    |    |    |    |    |    |     |     |     |     |    |    |     |    |    |    |    |    |
| A                     | 6  | 14 | 17 | 18 | 12 | 28 | 2  | 4  | 0  | 0   | 0   | 0   | 0   | 14 | 5  | 46  | 32 | 2  | 10 | 7  | 6  |
| C                     | 14 | 14 | 12 | 10 | 12 | 3  | 0  | 20 | 7  | 46  | 0   | 0   | 0   | 31 | 9  | 0   | 1  | 12 | 20 | 4  | 10 |
| G                     | 13 | 12 | 8  | 8  | 17 | 5  | 3  | 0  | 39 | 0   | 46  | 0   | 46  | 1  | 32 | 0   | 10 | 12 | 15 | 8  | 12 |
| T                     | 13 | 6  | 9  | 10 | 5  | 10 | 41 | 22 | 0  | 0   | 0   | 46  | 0   | 0  | 0  | 0   | 3  | 20 | 1  | 27 | 18 |
| <b>%</b>              |    |    |    |    |    |    |    |    |    |     |     |     |     |    |    |     |    |    |    |    |    |
| A                     | 13 | 30 | 37 | 39 | 26 | 61 | 4  | 9  | 0  | 0   | 0   | 0   | 0   | 30 | 11 | 100 | 70 | 4  | 22 | 15 | 13 |
| C                     | 30 | 30 | 26 | 22 | 26 | 7  | 0  | 43 | 15 | 100 | 0   | 0   | 0   | 67 | 20 | 0   | 2  | 26 | 43 | 9  | 22 |
| G                     | 28 | 26 | 17 | 17 | 37 | 11 | 7  | 0  | 85 | 0   | 100 | 0   | 100 | 2  | 70 | 0   | 22 | 26 | 33 | 17 | 26 |
| T                     | 28 | 13 | 20 | 22 | 11 | 22 | 89 | 48 | 0  | 0   | 0   | 100 | 0   | 0  | 0  | 0   | 7  | 43 | 2  | 59 | 39 |
| <b>YH439 (n = 28)</b> |    |    |    |    |    |    |    |    |    |     |     |     |     |    |    |     |    |    |    |    |    |
| <b>#</b>              |    |    |    |    |    |    |    |    |    |     |     |     |     |    |    |     |    |    |    |    |    |
| A                     | 1  | 7  | 7  | 10 | 8  | 12 | 1  | 3  | 0  | 0   | 0   | 0   | 0   | 6  | 0  | 26  | 22 | 3  | 8  | 1  | 4  |
| C                     | 6  | 7  | 8  | 9  | 10 | 4  | 1  | 7  | 3  | 28  | 0   | 0   | 0   | 22 | 7  | 0   | 2  | 6  | 13 | 4  | 7  |
| G                     | 9  | 11 | 6  | 8  | 7  | 2  | 5  | 1  | 24 | 0   | 28  | 0   | 28  | 0  | 21 | 1   | 1  | 8  | 5  | 7  | 5  |
| T                     | 12 | 3  | 7  | 1  | 3  | 10 | 21 | 17 | 1  | 0   | 0   | 28  | 0   | 0  | 0  | 1   | 3  | 11 | 2  | 16 | 12 |
| <b>%</b>              |    |    |    |    |    |    |    |    |    |     |     |     |     |    |    |     |    |    |    |    |    |
| A                     | 4  | 25 | 25 | 36 | 29 | 43 | 4  | 11 | 0  | 0   | 0   | 0   | 0   | 21 | 0  | 93  | 79 | 11 | 29 | 4  | 14 |
| C                     | 21 | 25 | 29 | 32 | 36 | 14 | 4  | 25 | 11 | 100 | 0   | 0   | 0   | 79 | 25 | 0   | 7  | 21 | 46 | 14 | 25 |
| G                     | 32 | 39 | 21 | 29 | 25 | 7  | 18 | 4  | 86 | 0   | 100 | 0   | 100 | 0  | 75 | 4   | 4  | 29 | 18 | 25 | 18 |
| T                     | 43 | 11 | 25 | 4  | 11 | 36 | 75 | 61 | 4  | 0   | 0   | 100 | 0   | 0  | 0  | 4   | 11 | 39 | 7  | 57 | 43 |
| <b>βNF (n = 38)</b>   |    |    |    |    |    |    |    |    |    |     |     |     |     |    |    |     |    |    |    |    |    |
| <b>#</b>              |    |    |    |    |    |    |    |    |    |     |     |     |     |    |    |     |    |    |    |    |    |
| A                     | 4  | 6  | 14 | 14 | 9  | 16 | 6  | 7  | 0  | 0   | 0   | 0   | 0   | 13 | 1  | 34  | 29 | 4  | 5  | 6  | 5  |
| C                     | 12 | 19 | 15 | 9  | 12 | 4  | 0  | 10 | 5  | 38  | 0   | 0   | 0   | 25 | 5  | 0   | 3  | 1  | 19 | 7  | 10 |
| G                     | 10 | 7  | 5  | 7  | 15 | 11 | 1  | 1  | 33 | 0   | 38  | 0   | 38  | 0  | 31 | 4   | 4  | 12 | 13 | 7  | 4  |
| T                     | 12 | 6  | 4  | 8  | 2  | 7  | 31 | 20 | 0  | 0   | 0   | 38  | 0   | 0  | 1  | 0   | 2  | 21 | 1  | 18 | 19 |
| <b>%</b>              |    |    |    |    |    |    |    |    |    |     |     |     |     |    |    |     |    |    |    |    |    |
| A                     | 11 | 16 | 37 | 37 | 24 | 42 | 16 | 18 | 0  | 0   | 0   | 0   | 0   | 34 | 3  | 89  | 76 | 11 | 13 | 16 | 13 |
| C                     | 32 | 50 | 39 | 24 | 32 | 11 | 0  | 26 | 13 | 100 | 0   | 0   | 0   | 66 | 13 | 0   | 8  | 3  | 50 | 18 | 26 |
| G                     | 26 | 18 | 13 | 18 | 39 | 29 | 3  | 3  | 87 | 0   | 100 | 0   | 100 | 0  | 82 | 11  | 11 | 32 | 34 | 18 | 11 |
| T                     | 32 | 16 | 11 | 21 | 5  | 18 | 82 | 53 | 0  | 0   | 0   | 100 | 0   | 0  | 3  | 0   | 5  | 55 | 3  | 47 | 50 |

**Supplemental Figure S2: Frequency calculation of nucleotide base utilization at each position of the DRE sequences obtained by binding site selection and amplification studies for each ligand.**

Continued on next page.

1 2 3 4 5 6 7 8 9 10 11 12 13 14 15 16 17 18 19 20 21

**Wild Type**  
 C C G G A G T T G C G T G A G A A G A G C

**3MC ( n= 30)**

|   |    |    |    |    |    |    |     |    |    |     |     |     |     |    |    |    |    |    |    |    |    |
|---|----|----|----|----|----|----|-----|----|----|-----|-----|-----|-----|----|----|----|----|----|----|----|----|
| # |    |    |    |    |    |    |     |    |    |     |     |     |     |    |    |    |    |    |    |    |    |
| A | 6  | 5  | 12 | 10 | 4  | 18 | 0   | 3  | 0  | 0   | 0   | 0   | 0   | 7  | 2  | 28 | 22 | 2  | 7  | 3  | 2  |
| C | 6  | 12 | 9  | 9  | 7  | 4  | 0   | 12 | 6  | 30  | 0   | 0   | 0   | 22 | 7  | 0  | 2  | 4  | 11 | 7  | 8  |
| G | 6  | 5  | 5  | 7  | 16 | 2  | 0   | 1  | 24 | 0   | 30  | 0   | 30  | 0  | 21 | 2  | 4  | 14 | 11 | 14 | 10 |
| T | 12 | 8  | 4  | 4  | 3  | 6  | 30  | 14 | 0  | 0   | 0   | 30  | 0   | 1  | 0  | 0  | 2  | 10 | 1  | 6  | 10 |
| % |    |    |    |    |    |    |     |    |    |     |     |     |     |    |    |    |    |    |    |    |    |
| A | 20 | 17 | 40 | 33 | 13 | 60 | 0   | 10 | 0  | 0   | 0   | 0   | 0   | 23 | 7  | 93 | 73 | 7  | 23 | 10 | 7  |
| C | 20 | 40 | 30 | 30 | 23 | 13 | 0   | 40 | 20 | 100 | 0   | 0   | 0   | 73 | 23 | 0  | 7  | 13 | 37 | 23 | 27 |
| G | 20 | 17 | 17 | 23 | 53 | 7  | 0   | 3  | 80 | 0   | 100 | 0   | 100 | 0  | 70 | 7  | 13 | 47 | 37 | 47 | 33 |
| T | 40 | 27 | 13 | 13 | 10 | 20 | 100 | 47 | 0  | 0   | 0   | 100 | 0   | 3  | 0  | 0  | 7  | 33 | 3  | 20 | 33 |

**IR ( n = 27)**

|   |    |    |    |    |    |    |    |    |    |     |     |     |     |    |    |    |    |    |    |    |    |
|---|----|----|----|----|----|----|----|----|----|-----|-----|-----|-----|----|----|----|----|----|----|----|----|
| # |    |    |    |    |    |    |    |    |    |     |     |     |     |    |    |    |    |    |    |    |    |
| A | 3  | 4  | 12 | 10 | 8  | 13 | 4  | 1  | 0  | 0   | 0   | 0   | 0   | 7  | 1  | 26 | 22 | 1  | 1  | 3  | 3  |
| C | 11 | 12 | 11 | 8  | 7  | 3  | 0  | 13 | 2  | 27  | 0   | 0   | 0   | 20 | 4  | 0  | 1  | 2  | 17 | 5  | 6  |
| G | 4  | 7  | 2  | 4  | 9  | 4  | 1  | 1  | 24 | 0   | 27  | 0   | 27  | 0  | 22 | 1  | 4  | 9  | 7  | 4  | 2  |
| T | 9  | 4  | 2  | 5  | 3  | 7  | 22 | 12 | 1  | 0   | 0   | 27  | 0   | 0  | 0  | 0  | 0  | 15 | 2  | 15 | 16 |
| % |    |    |    |    |    |    |    |    |    |     |     |     |     |    |    |    |    |    |    |    |    |
| A | 11 | 15 | 44 | 37 | 30 | 48 | 15 | 4  | 0  | 0   | 0   | 0   | 0   | 26 | 4  | 96 | 81 | 4  | 4  | 11 | 11 |
| C | 41 | 44 | 41 | 30 | 26 | 11 | 0  | 48 | 7  | 100 | 0   | 0   | 0   | 74 | 15 | 0  | 4  | 7  | 63 | 19 | 22 |
| G | 15 | 26 | 7  | 15 | 33 | 15 | 4  | 4  | 89 | 0   | 100 | 0   | 100 | 0  | 81 | 4  | 15 | 33 | 26 | 15 | 7  |
| T | 33 | 15 | 7  | 19 | 11 | 26 | 81 | 44 | 4  | 0   | 0   | 100 | 0   | 0  | 0  | 0  | 0  | 56 | 7  | 56 | 59 |

**LK ( n = 27)**

|   |    |    |    |    |    |    |     |    |    |     |     |     |     |    |    |    |    |    |    |    |    |
|---|----|----|----|----|----|----|-----|----|----|-----|-----|-----|-----|----|----|----|----|----|----|----|----|
| # |    |    |    |    |    |    |     |    |    |     |     |     |     |    |    |    |    |    |    |    |    |
| A | 3  | 7  | 15 | 9  | 6  | 15 | 0   | 2  | 0  | 0   | 0   | 0   | 0   | 11 | 2  | 24 | 22 | 2  | 4  | 4  | 5  |
| C | 7  | 13 | 7  | 11 | 5  | 2  | 0   | 8  | 8  | 27  | 0   | 0   | 0   | 15 | 8  | 0  | 1  | 6  | 11 | 4  | 3  |
| G | 7  | 3  | 1  | 4  | 14 | 6  | 0   | 1  | 18 | 0   | 27  | 0   | 27  | 0  | 17 | 2  | 3  | 6  | 7  | 7  | 5  |
| T | 10 | 4  | 4  | 3  | 2  | 4  | 27  | 16 | 1  | 0   | 0   | 27  | 0   | 1  | 0  | 1  | 1  | 13 | 5  | 12 | 14 |
| % |    |    |    |    |    |    |     |    |    |     |     |     |     |    |    |    |    |    |    |    |    |
| A | 11 | 26 | 56 | 33 | 22 | 56 | 0   | 7  | 0  | 0   | 0   | 0   | 0   | 41 | 7  | 89 | 81 | 7  | 15 | 15 | 19 |
| C | 26 | 48 | 26 | 41 | 19 | 7  | 0   | 30 | 30 | 100 | 0   | 0   | 0   | 56 | 30 | 0  | 4  | 22 | 41 | 15 | 11 |
| G | 26 | 11 | 4  | 15 | 52 | 22 | 0   | 4  | 67 | 0   | 100 | 0   | 100 | 0  | 63 | 7  | 11 | 22 | 26 | 26 | 19 |
| T | 37 | 15 | 15 | 11 | 7  | 15 | 100 | 59 | 4  | 0   | 0   | 100 | 0   | 4  | 0  | 4  | 4  | 48 | 19 | 44 | 52 |

**Supplemental Figure S2: Frequency calculation of nucleotide base utilization at each position of the DRE sequences obtained by binding site selection and amplification studies for each ligand.**

Continued on next page.

|                                | 1  | 2  | 3  | 4  | 5  | 6   | 7   | 8   | 9   | 10  | 11  | 12  | 13  | 14  | 15  | 16  | 17  | 18 | 19 | 20 | 21 |
|--------------------------------|----|----|----|----|----|-----|-----|-----|-----|-----|-----|-----|-----|-----|-----|-----|-----|----|----|----|----|
| <b>Wild Type</b>               |    |    |    |    |    |     |     |     |     |     |     |     |     |     |     |     |     |    |    |    |    |
|                                | C  | C  | G  | G  | A  | G   | T   | T   | G   | C   | G   | T   | G   | A   | G   | A   | A   | G  | A  | G  | C  |
| <b>All Sequences (n = 196)</b> |    |    |    |    |    |     |     |     |     |     |     |     |     |     |     |     |     |    |    |    |    |
| <b>#</b>                       |    |    |    |    |    |     |     |     |     |     |     |     |     |     |     |     |     |    |    |    |    |
| A                              | 23 | 43 | 77 | 71 | 47 | 102 | 13  | 20  | 0   | 0   | 0   | 0   | 0   | 58  | 11  | 184 | 149 | 14 | 35 | 24 | 25 |
| C                              | 56 | 77 | 62 | 56 | 53 | 20  | 1   | 70  | 31  | 196 | 0   | 0   | 0   | 135 | 40  | 0   | 10  | 31 | 91 | 31 | 44 |
| G                              | 49 | 45 | 27 | 38 | 78 | 30  | 10  | 5   | 162 | 0   | 196 | 0   | 196 | 1   | 144 | 10  | 26  | 61 | 58 | 47 | 38 |
| T                              | 68 | 31 | 30 | 31 | 18 | 44  | 172 | 101 | 3   | 0   | 0   | 196 | 0   | 2   | 1   | 2   | 11  | 90 | 12 | 94 | 89 |
| <b>%</b>                       |    |    |    |    |    |     |     |     |     |     |     |     |     |     |     |     |     |    |    |    |    |
| A                              | 12 | 22 | 39 | 36 | 24 | 52  | 7   | 10  | 0   | 0   | 0   | 0   | 0   | 30  | 6   | 94  | 76  | 7  | 18 | 12 | 13 |
| C                              | 29 | 39 | 32 | 29 | 27 | 10  | 1   | 36  | 16  | 100 | 0   | 0   | 0   | 69  | 20  | 0   | 5   | 16 | 46 | 16 | 22 |
| G                              | 25 | 23 | 14 | 19 | 40 | 15  | 5   | 3   | 83  | 0   | 100 | 0   | 100 | 1   | 73  | 5   | 13  | 31 | 30 | 24 | 19 |
| T                              | 35 | 16 | 15 | 16 | 9  | 22  | 88  | 52  | 2   | 0   | 0   | 100 | 0   | 1   | 1   | 1   | 6   | 46 | 6  | 48 | 45 |

**Supplemental Figure S2: Frequency calculation of nucleotide base utilization at each position of the DRE sequences obtained by binding site selection and amplification studies for each ligand.**

The number of times a specific base appears at each position as well as its relative percentage at each position is shown (calculated using the total number of sequences for a particular ligand).

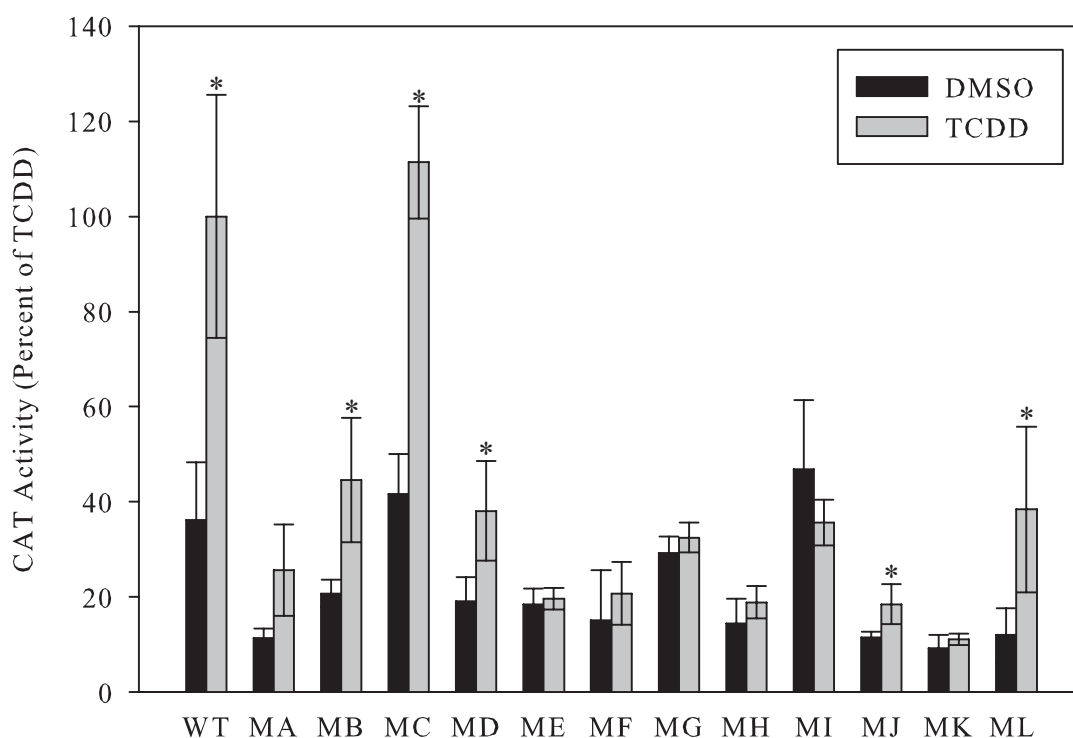

**Supplemental Figure S3: Effect of site-directed mutation of the DRE consensus sequence on TCDD-inducible chloramphenicol acetyltransferase (CAT) reporter gene activity.**

Hepal1c7 cells were transiently transfected with pMcat5 containing a single wild type (WT) or mutant (M) DRE response element, with the lettering indicating a specific mutation described in Table 2. Cells were incubated with DMSO (0.1%) or 1 nM TCDD for 24 hours prior to determination of CAT activity. Values represent the mean  $\pm$  SD of at least three independent determinations and all activity normalized to that obtained with TCDD-treated cells transfected with pMcat5 containing the WT DRE. The asterisk indicates those values that are significantly greater than the activity of the respective DMSO treated samples (Student's *t*-test; \* $p < 0.05$ ). The CAT activity of all extracts from cells transfected with mutant DRE CAT reporter plasmids and incubated with TCDD (except for that of sample MC), were significantly different than that of TCDD-inducible CAT activity in extracts of cells transfected with a CAT reporter plasmid containing the wild type DRE oligonucleotide (Student's *t*-test;  $p < 0.05$ ).

| Oligo    | DRE Nucleotide Position |   |   |   |   |   |   |   |    |    |    |    |    |    |    |    |    |    |    |      | Binding | Function |
|----------|-------------------------|---|---|---|---|---|---|---|----|----|----|----|----|----|----|----|----|----|----|------|---------|----------|
|          | 2                       | 3 | 4 | 5 | 6 | 7 | 8 | 9 | 10 | 11 | 12 | 13 | 14 | 15 | 16 | 17 | 18 | 19 | 20 |      |         |          |
|          | C                       | G | G | A | G | T | T | G | C  | G  | T  | G  | A  | G  | A  | A  | G  | A  | G  |      |         |          |
| WT       | .                       | . | . | . | . | . | . | . | .  | .  | .  | .  | .  | .  | .  | .  | .  | .  | .  | +++  | +++     |          |
| MD1 (A)  | T                       | . | . | . | . | . | . | . | .  | .  | .  | .  | .  | .  | .  | .  | .  | .  | .  | +++  | -       |          |
| MD2      | A                       | . | . | . | . | . | . | . | .  | .  | .  | .  | .  | .  | .  | .  | .  | .  | .  | +++  | +++     |          |
| JW9      | T                       | . | . | . | . | . | . | . | .  | .  | .  | .  | .  | .  | .  | .  | .  | .  | .  | +++  | +++     |          |
| JW10     | .                       | T | . | . | . | . | . | . | .  | .  | .  | .  | .  | .  | .  | .  | .  | .  | .  | +++  | +++     |          |
| MD3 (B)  | .                       | . | . | A | . | . | . | . | .  | .  | .  | .  | .  | .  | .  | .  | .  | .  | .  | +++  | ++      |          |
| MD4      | .                       | . | . | T | . | . | . | . | .  | .  | .  | .  | .  | .  | .  | .  | .  | .  | .  | +++  | +++     |          |
| JW11     | .                       | . | . | A | . | . | . | . | .  | .  | .  | .  | .  | .  | .  | .  | .  | .  | .  | +++  | +++     |          |
| MD5 (C)  | .                       | . | . | . | G | . | . | . | .  | .  | .  | .  | .  | .  | .  | .  | .  | .  | .  | +++  | +++     |          |
| JW6      | .                       | . | . | . | C | . | . | . | .  | .  | .  | .  | .  | .  | .  | .  | .  | .  | .  | +/-? | -       |          |
| M1       | .                       | . | . | . | A | . | . | . | .  | .  | .  | .  | .  | .  | .  | .  | .  | .  | .  | +++  | ++      |          |
| JW17     | .                       | . | . | . | . | C | . | . | .  | .  | .  | .  | .  | .  | .  | .  | .  | .  | .  | +++  | +++     |          |
| M2       | .                       | . | . | . | . | A | . | . | .  | .  | .  | .  | .  | .  | .  | .  | .  | .  | .  | +++  | ++      |          |
| M3       | .                       | . | . | . | . | G | . | . | .  | .  | .  | .  | .  | .  | .  | .  | .  | .  | .  | +++  | ++      |          |
| MD6 (D)  | .                       | . | . | . | . | . | T | . | .  | .  | .  | .  | .  | .  | .  | .  | .  | .  | .  | ++   | ++      |          |
| JW5      | .                       | . | . | . | . | . | A | . | .  | .  | .  | .  | .  | .  | .  | .  | .  | .  | .  | +++  | -       |          |
| M4       | .                       | . | . | . | . | . | C | . | .  | .  | .  | .  | .  | .  | .  | .  | .  | .  | .  | +++  | ++      |          |
| MD7 (E)  | .                       | . | . | . | . | . | . | A | .  | .  | .  | .  | .  | .  | .  | .  | .  | .  | .  | -    | -       |          |
| MD8      | .                       | . | . | . | . | . | . | T | .  | .  | .  | .  | .  | .  | .  | .  | .  | .  | .  | -    | ND      |          |
| JW1      | .                       | . | . | . | . | . | . | T | .  | .  | .  | .  | .  | .  | .  | .  | .  | .  | .  | -    | ND      |          |
| JW13     | .                       | . | . | . | . | . | . | G | .  | .  | .  | .  | .  | .  | .  | .  | .  | .  | .  | -    | ND      |          |
| MD9 (F)  | .                       | . | . | . | . | . | . | . | T  | .  | .  | .  | .  | .  | .  | .  | .  | .  | .  | -    | -       |          |
| JW2      | .                       | . | . | . | . | . | . | . | A  | .  | .  | .  | .  | .  | .  | .  | .  | .  | .  | -    | -       |          |
| MD10 (G) | .                       | . | . | . | . | . | . | . | .  | G  | .  | .  | .  | .  | .  | .  | .  | .  | .  | -    | -       |          |
| JW7      | .                       | . | . | . | . | . | . | . | .  | C  | .  | .  | .  | .  | .  | .  | .  | .  | .  | -    | -       |          |
| JW14     | .                       | . | . | . | . | . | . | . | .  | A  | .  | .  | .  | .  | .  | .  | .  | .  | .  | -    | ND      |          |
| MD11 (H) | .                       | . | . | . | . | . | . | . | .  | .  | T  | .  | .  | .  | .  | .  | .  | .  | .  | -    | -       |          |
| JW3      | .                       | . | . | . | . | . | . | . | .  | A  | .  | .  | .  | .  | .  | .  | .  | .  | .  | -    | ND      |          |
| JW15     | .                       | . | . | . | . | . | . | . | .  | .  | C  | .  | .  | .  | .  | .  | .  | .  | .  | -    | ND      |          |
| MD12 (I) | .                       | . | . | . | . | . | . | . | .  | .  | .  | G  | .  | .  | .  | .  | .  | .  | .  | -    | -       |          |
| JW16     | .                       | . | . | . | . | . | . | . | .  | .  | .  | G  | .  | .  | .  | .  | .  | .  | .  | +/-  | -       |          |
| M5       | .                       | . | . | . | . | . | . | . | .  | .  | .  | .  | T  | .  | .  | .  | .  | .  | .  | +++  | ++      |          |
| MD13 (J) | .                       | . | . | . | . | . | . | . | .  | .  | .  | .  | .  | T  | .  | .  | .  | .  | .  | +++  | +       |          |
| JW4      | .                       | . | . | . | . | . | . | . | .  | .  | .  | .  | .  | A  | .  | .  | .  | .  | .  | +/-  | -       |          |
| M6       | .                       | . | . | . | . | . | . | . | .  | .  | .  | .  | .  | C  | .  | .  | .  | .  | .  | +++  | +++     |          |
| MD14 (K) | .                       | . | . | . | . | . | . | . | .  | .  | .  | .  | .  | .  | C  | .  | .  | .  | .  | ++   | -       |          |
| JW12     | .                       | . | . | . | . | . | . | . | .  | .  | .  | .  | .  | .  | G  | .  | .  | .  | .  | +/-  | -       |          |
| M7       | .                       | . | . | . | . | . | . | . | .  | .  | .  | .  | .  | .  | G  | .  | .  | .  | .  | +++  | ++      |          |
| MD15     | .                       | . | . | . | . | . | . | . | .  | .  | .  | .  | .  | .  | T  | .  | .  | .  | .  | ++   | ++      |          |
| M8       | .                       | . | . | . | . | . | . | . | .  | .  | .  | .  | .  | .  | .  | G  | .  | .  | .  | +++  | +++     |          |
| MD16     | .                       | . | . | . | . | . | . | . | .  | .  | .  | .  | .  | .  | .  | .  | A  | .  | .  | ++   | ++      |          |
| MD17 (L) | .                       | . | . | . | . | . | . | . | .  | .  | .  | .  | .  | .  | .  | .  | .  | T  | .  | ++   | ++      |          |
| MD18     | T                       | . | . | A | G | . | . | . | .  | .  | .  | .  | .  | .  | .  | .  | .  | .  | .  | +++  | ND      |          |
| MD19     | .                       | . | . | . | . | . | . | . | .  | .  | .  | .  | .  | T  | C  | .  | .  | .  | .  | ++   | ND      |          |
| MD20     | .                       | . | . | . | . | . | . | . | .  | .  | .  | .  | .  | .  | T  | .  | .  | T  | .  | ++   | ND      |          |

**Supplemental Table S1: Relative AhR binding and enhancer function of the DRE derived from mutagenesis experiments.**

Relative magnitude of binding and function is indicated by a (+) sign, while the lack of activity is indicated by a (-) sign. “MD” mutant data are from Yao and Denison (1992), and a letter in parenthesis indicates the nomenclature of the mutant as used in this paper. “JW” mutant data are from Shen and Whitlock (1992). “M” mutant data are from this paper. ND, not determined.
